# Supplementary material
Source: HighWire-hosted journal article supplement (https://www.g3journal.org/content/suppl/2013/12/24/g3.113.009084)
Supplement: TableS6.pdf [file TableS6.pdf]

**Table S6 Genes potentially involved in host tolerance of the symbiont that are differentially expressed between symbiotic and aposymbiotic anemones.<sup>a</sup>**

| Protein (from top BLAST hit)                                         | UniProt accession number | Locus #/ transcript # | BLAST-hit E-value | Fold-Change <sup>b</sup> |
|----------------------------------------------------------------------|--------------------------|-----------------------|-------------------|--------------------------|
| <b>A. Response to oxidative stress</b>                               |                          |                       |                   |                          |
| Catalase                                                             | P04040                   | 100968/1              | 0                 | -4.7                     |
| ADAM (disintegrin and metalloproteinase domain-containing protein) 9 | Q13443                   | 123296/1              | 2e-62             | -3                       |
| Transient receptor potential cation channel (subfamily M, member 2)  | Q91YD4                   | 125627/1              | 7e-16             | -2.9                     |
| Peroxidasin-related protein 1                                        | Q92626                   | 99631/1               | 4e-06             | -2.5                     |
| Dual oxidase 2                                                       | Q8HZK2                   | 17080/2               | 5e-27             | -2                       |
| Allene oxide synthase-lipoxygenase                                   | O16025                   | 9291/1                | 4e-38             | -1.8                     |
| Soluble guanylate cyclase 88E                                        | Q8INF0                   | 7254/1                | 1e-171            | 1.9                      |
| Peroxidasin-related protein 2                                        | A1KZ92                   | 57146/1               | 7e-25             | 2.9                      |
| <b>B. Inflammation/tissue remodeling/response to wounding</b>        |                          |                       |                   |                          |
| Transmembrane serine protease 6 <sup>c</sup>                         | Q9DBI0                   | 81296/1               | 3e-50             | -6.1                     |
| Plasma kallikrein <sup>d</sup>                                       | P14272                   | 12789/1               | 7e-47             | -4                       |
| Mannan-binding lectin serine peptidase 1 (MASP-1) <sup>e</sup>       | Q8CHN8                   | 36375/1               | 5e-12             | -3                       |
| Plasminogen <sup>f</sup>                                             | P00747                   | 21286/1               | 3e-47             | -3                       |
| Plasma kallikrein <sup>d</sup>                                       | P03952                   | 84752/1               | 1e-48             | -2.9                     |
| Ephrin type-a receptor 3 <sup>g</sup>                                | P29320                   | 6695/1                | 2e-63             | -2.8                     |
| Phospholipase A2 (isoform 4) <sup>h</sup>                            | Q6T179                   | 3740/5                | 1e-26             | -2.4                     |
| Arachidonate 5-lipoxygenase <sup>i</sup>                             | P48999                   | 55879/1               | 5e-28             | -1.7                     |
| Plasma kallikrein <sup>d</sup>                                       | P26262                   | 73922/1               | 8e-40             | 2.1                      |
| Ficolin 2 <sup>j</sup>                                               | Q15485                   | 62279/1               | 1e-42             | 2.2                      |
| Vanin-1 <sup>k</sup>                                                 | Q58CQ9                   | 48344/1               | 8e-118            | 2.6                      |
| Discoidin, CUB, and LCCL domain containing 2 <sup>l</sup>            | Q91ZV2                   | 80843/1               | 3e-12             | 2.7                      |
| Hepatocyte nuclear factor 4 (alpha) <sup>m</sup>                     | P22449                   | 34830/4               | 1e-113            | 3.6                      |
| Adenosine A2b receptor <sup>n</sup>                                  | O13076                   | 66307/1               | 2e-17             | 4.2                      |
| Scavenger receptor class B member 1 <sup>o</sup>                     | Q8WTV0                   | 77179/1               | 9e-65             | 28                       |
| <b>C. Apoptosis/cell death</b>                                       |                          |                       |                   |                          |
| Transcription factor E2F2                                            | P56931                   | 1568/1                | 5e-07             | -4.2                     |
| Receptor-binding cancer antigen expressed on SiSo cells              | Q865S0                   | 42283/1               | 4e-06             | -2.7                     |
| Tumor protein p73                                                    | Q9JJP2                   | 88973/1               | 2e-35             | -2.4                     |
| Paired box protein Pax-3                                             | P23760                   | 46973/1               | 3e-43             | -1.8                     |
| Apoptosis-inducing factor 1 (mitochondrial)                          | Q9JM53                   | 21845/2               | 1e-171            | -1.8                     |
| TNF (Tumor Necrosis Factor) receptor associated factor 3             | Q13114                   | 30586/1               | 2e-74             | 1.8                      |
| TNF superfamily member 12                                            | O43508                   | 18277/1               | 1e-07             | 1.9                      |

|                                                               |        |         |        |     |
|---------------------------------------------------------------|--------|---------|--------|-----|
| Kruppel-like factor 11                                        | O14901 | 58173/1 | 8e-51  | 2.6 |
| G1 to S phase transition 1                                    | P15170 | 25564/1 | 0      | 2.8 |
| Growth arrest and DNA damage-inducible protein (GADD45 gamma) | Q9Z111 | 55453/1 | 6e-09  | 5.1 |
| Ribonucleoside-diphosphate reductase (small chain C)          | Q9LSD0 | 18748/1 | 1e-132 | 12  |
| Organic cation transporter                                    | Q9VCA2 | 88336/1 | 6e-35  | 44  |
| TNF receptor superfamily member 27                            | Q8BX35 | 94982/1 | 9e-10  | 60  |

<sup>a</sup> The set of all transcripts displaying differential expression by RNA-Seq was analyzed to identify biological processes (based on GO terms) that were overrepresented in this set relative to the background transcriptome (see Materials and Methods). The sets of processes identified here (A, B, and C) emerged from this analysis and may be involved in host tolerance of the symbiont.

<sup>b</sup> In all but one case, the arithmetic mean of the values from the two RNA-Seq experiments is shown. For transcript 77179/1 (last line of section B), the value from Experiment 1 is shown for reasons explained in Table S3, footnote b. Positive fold-changes, expression higher in symbiotic anemones; negative fold-changes, expression higher in aposymbiotic anemones.

<sup>c</sup> Hydrolyzes a range of proteins including type I collagen, fibronectin, and fibrinogen and may play a role in matrix-remodeling processes ([Hooper et al. 2003](#)).

<sup>d</sup> Serine proteases activated by tissue injury or microbial invasion; they activate the release of potent pro-inflammatory cytokines that ultimately result in the release of effector molecules such as nitric oxide and tumor necrosis factor- $\alpha$  and can stimulate the complement innate-immunity system ([Lalmanach et al. 2010](#); [Moreau et al. 2005](#)).

<sup>e</sup> Plays a role as an amplifier of the complement cascade, potentially via the activation of MASP-2 ([Takahashi et al. 2008](#)).

<sup>f</sup> The zymogen of plasmin; it can be activated via plasma kallikrein and functions in the breakdown of fibrin in fibrinolysis, the activation of proteases, and the modulation of cell adhesion ([Li et al. 2003](#)).

<sup>g</sup> A receptor tyrosine kinase that binds membrane-bound ephrin family ligands residing on adjacent cells and regulates cell-cell adhesion, cytoskeletal organization, and cell migration ([Smith et al. 2004](#)).

<sup>h</sup> Releases arachidonic acid from cellular membrane phospholipids, leading to its conversion to pro-inflammatory prostaglandins via arachidonate 5-lipoxygenase ([Moreau et al. 2005](#)).

<sup>i</sup> See note h.

<sup>j</sup> A lectin whose binding to microbial surface glycans can initiate activation of the complement pathway ([Endo et al. 2007](#)); it also appears to bind to cell-surface glycans of *Symbiodinium* ([Logan et al. 2010](#)).

<sup>k</sup> Hydrolyzes pantetheine to pantothenic acid and cysteamine, the latter of which can lead to acute and chronic epithelial inflammation ([Martin et al. 2004](#)).

<sup>l</sup> Thought to play a role in cell adhesion and wound healing ([Kobuke et al. 2001](#)).

<sup>m</sup> A transcriptional regulator that is decreased in inflammatory bowel disease and protects against chemically-induced colitis in mice ([Darsigny et al. 2009](#)).

<sup>n</sup> Its activation appears to result in inhibition of pro-inflammatory cytokine production, and mice deficient in A2b receptors are more susceptible to intestinal inflammation ([Gessi et al. 2011](#)).

<sup>o</sup> See text.
